# Supplementary material
Source: ML conference proceedings conference paper supplement (https://openaccess.thecvf.com/content/CVPR2026/html/Ham_Generating_Humanless_Environment_CVPR_2026_paper.html)
Supplement: Supplementary file 1 [file Ham_Generating_Humanless_Environment_CVPR_2026_supplemental.pdf]

# Generating Humanless Environment Walkthroughs from Egocentric Walking Tour Videos

## Supplementary Material

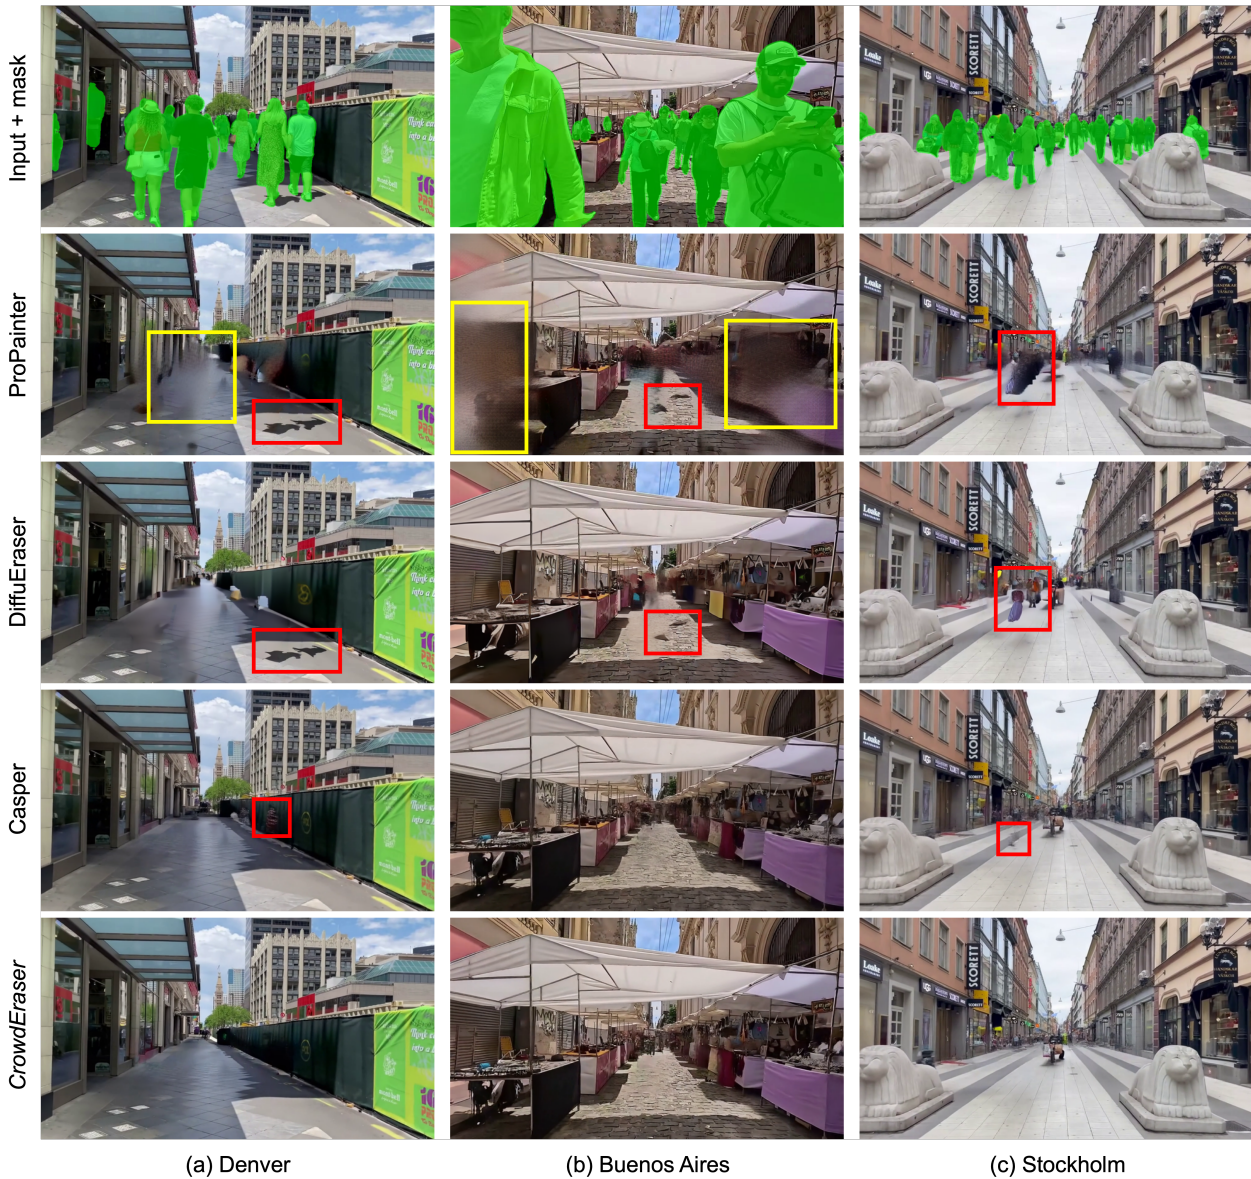

Figure 9. **Full baseline comparison for the scenes in Figure 1.** Red boxes indicate failures in foreground removal or shadow handling, while yellow boxes highlight blurry inpainting artifacts. ProPainter [48] and DiffuEraser [18] struggle with sharp cast shadows and often blur or lose details in large masked regions. Casper achieves more reliable effect association but exhibits noticeable hallucinations when masks become large. In contrast, *CrowdEraser* remains robust under significant mask sizes, preserving background structure and producing more visually plausible results.

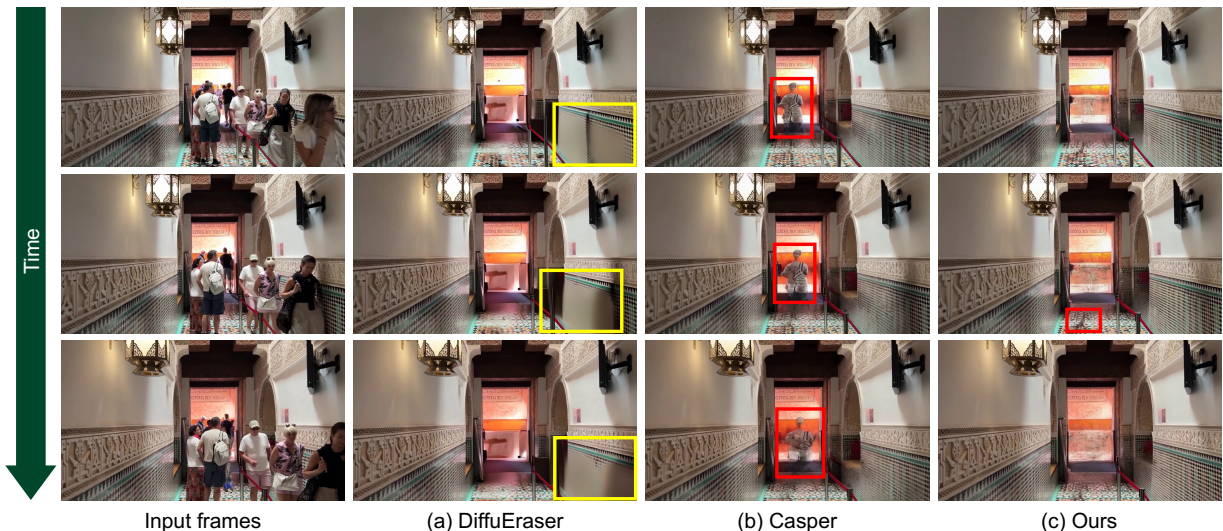

Figure 10. **Baseline comparison across temporal frames for the “Marrakech” scene in Figure 5.** Red boxes indicate failures in foreground removal or shadow handling, while yellow boxes mark regions where the background is over-smoothed instead of plausibly inpainted. Casper [24] struggles with larger masks, producing noticeable hallucinations within masked areas, whereas DiffuEraser [18] tends to over-smooth patterns in occluded regions.

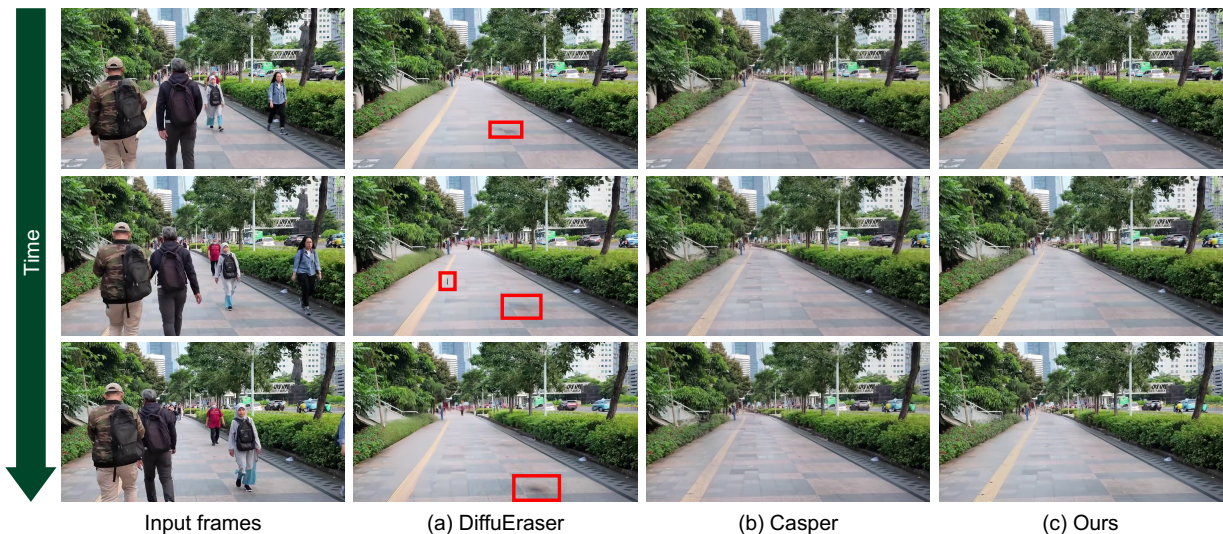

Figure 11. **Baseline comparison across temporal frames for the ‘Jakarta’ scene in Figure 5.** Red boxes highlight failures in foreground removal or shadow handling. DiffuEraser [18] struggles to capture shadows, leading to floating shadows on the pathway.

We provide per-scene quantitative results in Table 3. Our *CrowdEraser* consistently achieves the best DreamSim scores, reflecting better perceptual quality aligned with human judgment. While ProPainter attains higher PSNR in some cases, this mainly stems from its strict adherence to the mask rather than improved inpainting, as PSNR is affected by unmasked, and thus unchanged, pixels. Notably, our method achieves higher in-mask PSNR, indicating more

accurate inpainting within the masked regions.

We present additional qualitative examples, including comprehensive baseline comparisons in Figure 9, temporal dynamics, and comparisons with two recent methods in Figures 10–13, as well as extended 4D reconstruction results in Figures 14–15.

For reproducibility, we provide a comprehensive list of videos used to construct our dataset in Tables 4–6.

Table 3. **Quantitative comparison across cities.** Best results are highlighted in red and second-best in yellow. Our *CrowdEraser* consistently achieves the best DreamSim, reflecting superior perceptual quality.

| Scene            | Birmingham      |                       | Boston          |                       | Capetown        |                       | Chicago         |                       | Dubai           |                       | Rome            |                       | Zurich          |                       |
|------------------|-----------------|-----------------------|-----------------|-----------------------|-----------------|-----------------------|-----------------|-----------------------|-----------------|-----------------------|-----------------|-----------------------|-----------------|-----------------------|
|                  | PSNR $\uparrow$ | DreamSim $\downarrow$ |
| ProPainter [48]  | 27.77           | 0.052                 | 26.00           | 0.049                 | 25.86           | 0.059                 | 25.91           | 0.053                 | 22.34           | 0.050                 | 29.97           | 0.019                 | 25.76           | 0.059                 |
| DiffuEraser [18] | 27.25           | 0.034                 | 25.49           | 0.042                 | 25.43           | 0.050                 | 25.59           | 0.036                 | 22.65           | 0.042                 | 29.86           | 0.013                 | 25.14           | 0.049                 |
| Casper [17]      | 26.15           | 0.028                 | 25.12           | 0.031                 | 24.20           | 0.035                 | 26.02           | 0.022                 | 23.14           | 0.027                 | 29.44           | 0.012                 | 25.21           | 0.027                 |
| Ours             | 26.58           | 0.022                 | 26.00           | 0.025                 | 25.50           | 0.026                 | 27.08           | 0.019                 | 24.81           | 0.019                 | 30.31           | 0.009                 | 25.99           | 0.022                 |

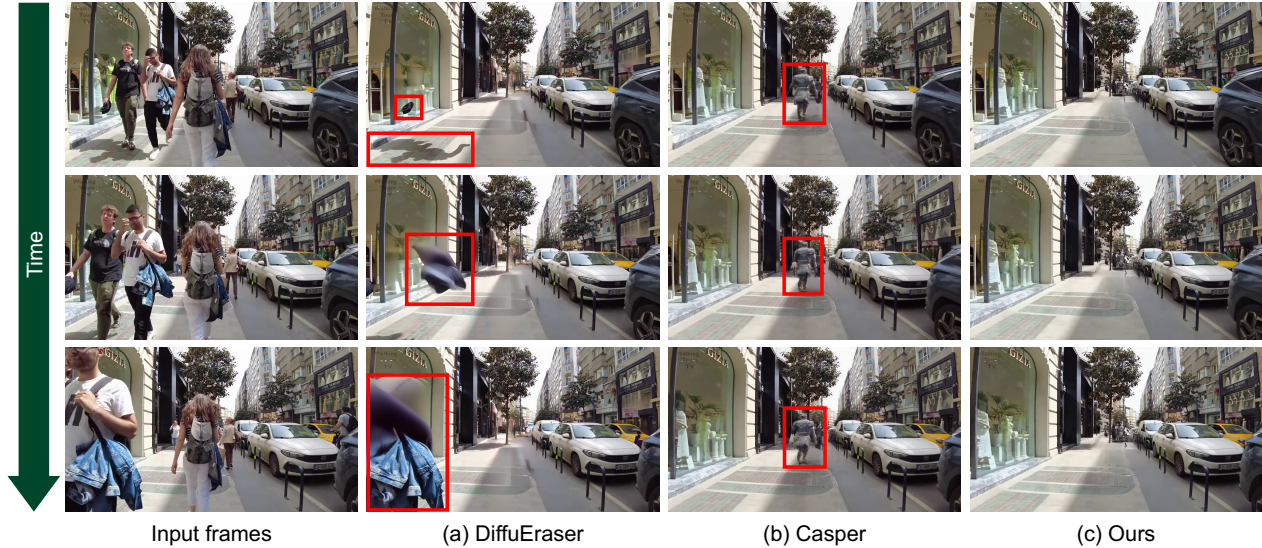

Figure 12. **Baseline comparison across temporal frames for the “Istanbul” scene in Figure 5.** Red boxes indicate failures in foreground removal or shadow handling. Casper [24] struggles with larger masks, producing noticeable hallucinations within masked areas, while DiffuEraser [18] has difficulty handling shadows and removing associated objects.

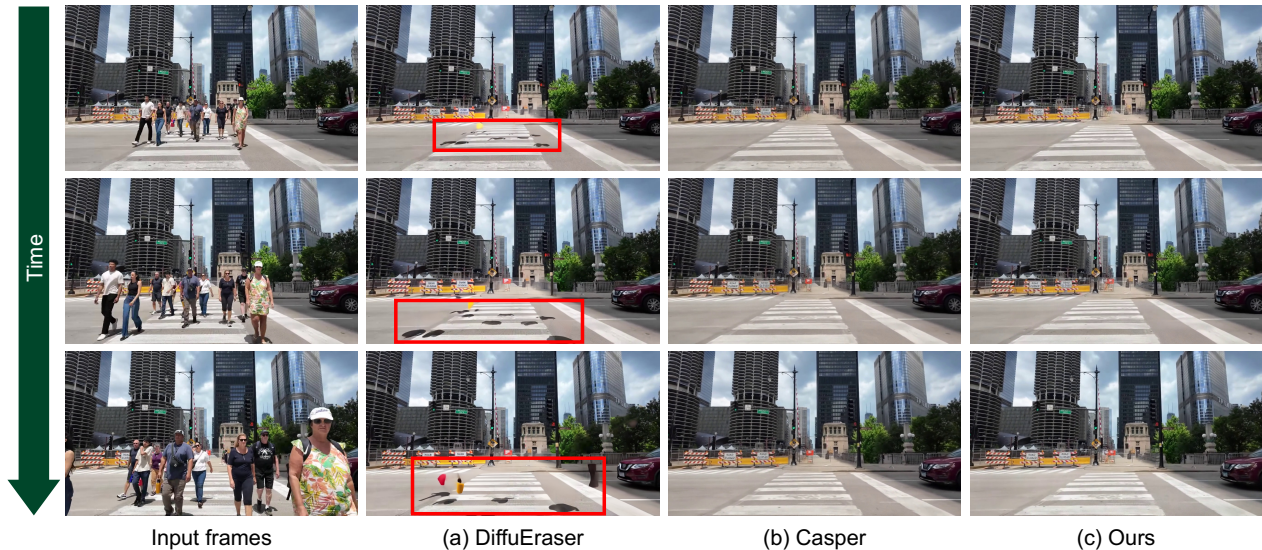

Figure 13. **Baseline comparison across temporal frames for the “Chicago” scene in Figure 5.** Red boxes highlight failures in foreground removal or shadow handling. DiffuEraser [18] struggles to associate shadows and objects, leading to floating shadows and objects.

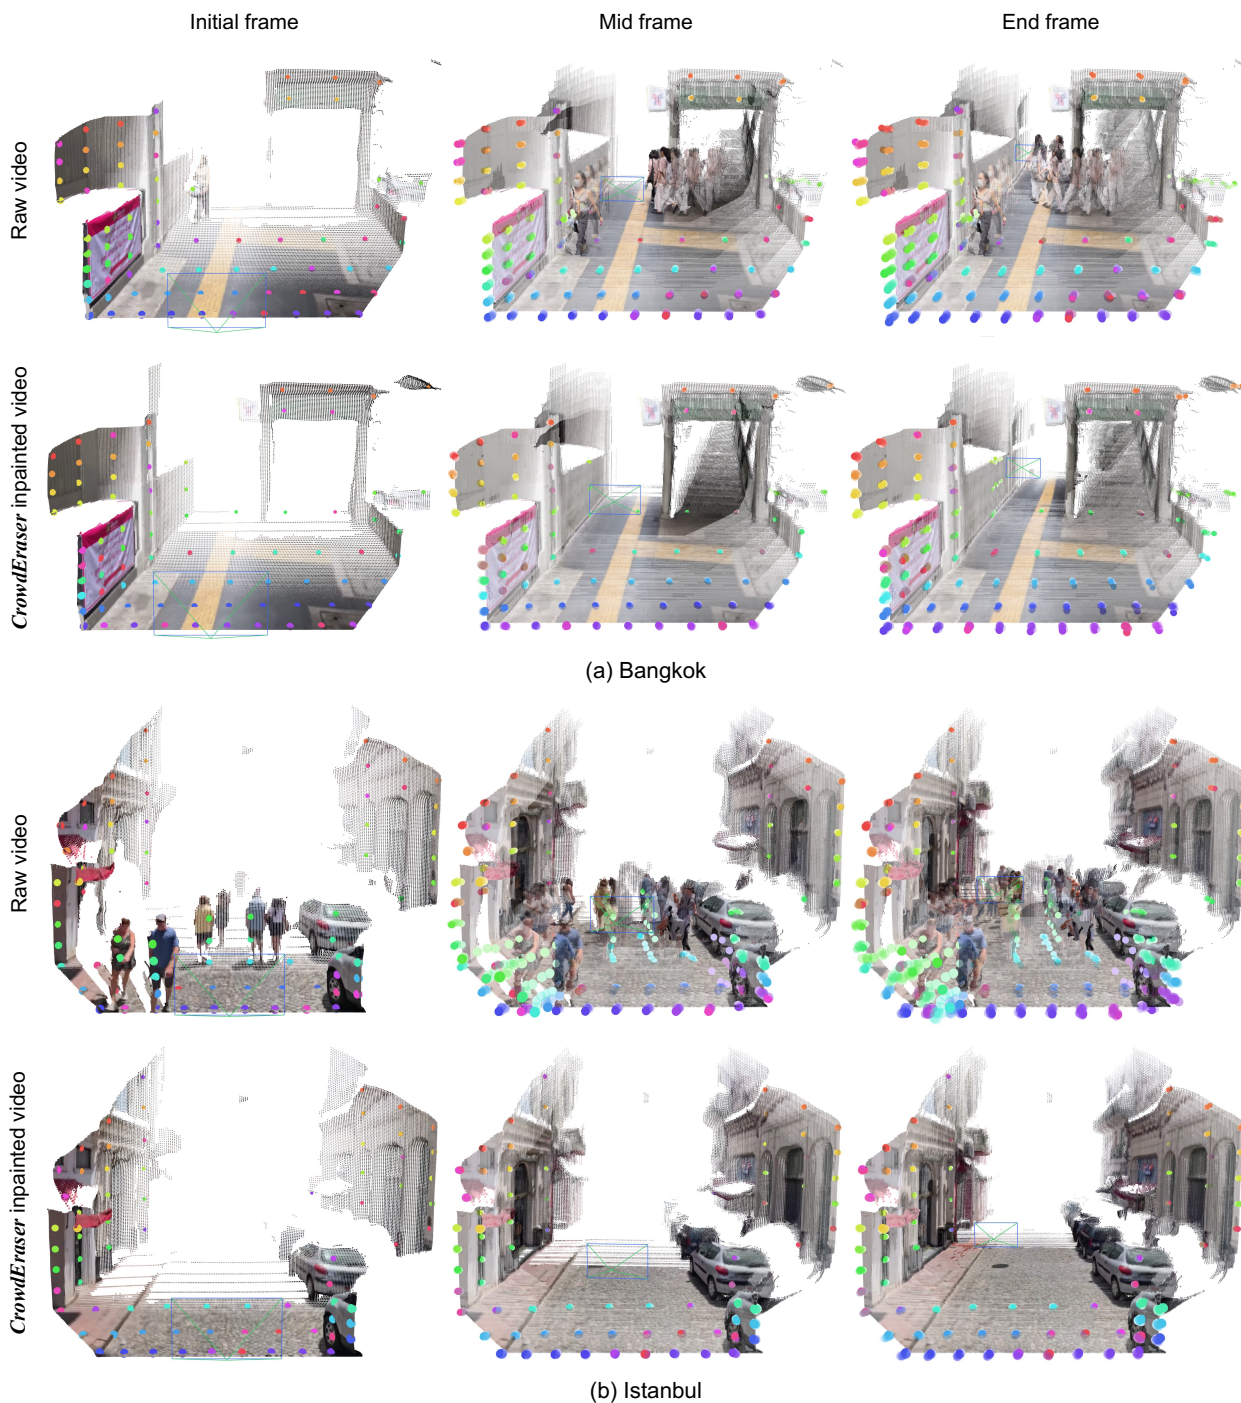

Figure 14. **SpatialTrackerV2 4D reconstruction results.** We compare results using raw walking tour video inputs (top) versus our crowd-removed versions (bottom). Each image displays the inferred 3D point clouds for the scene visualized from the camera viewpoint of the initial, middle, and final video frames, with overlaid colored circles corresponding to point tracks in the 3D space. Tracking points remain more stable in static background regions, indicating that our crowd removal leads to more reliable and robust reconstruction. Moreover, the resulting point clouds are denser and more consistent, benefiting downstream tasks such as scene modeling and 3D novel view synthesis.

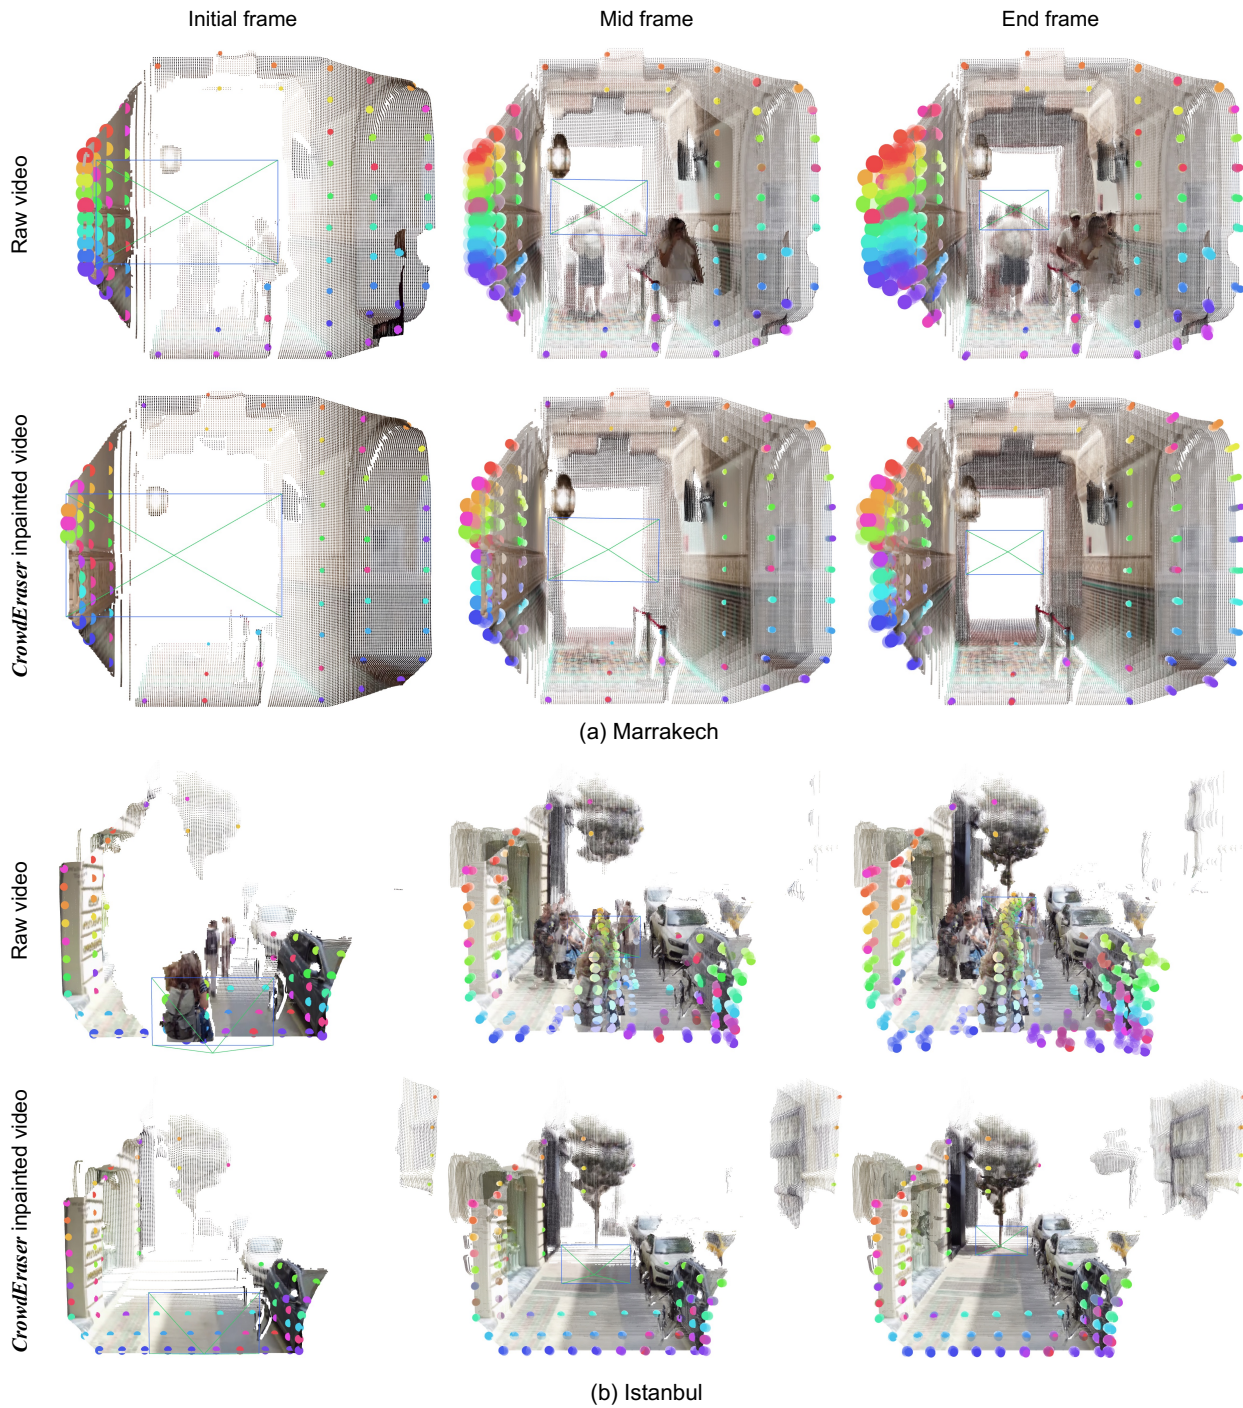

Figure 15. **SpatialTrackerV2 4D reconstruction results.** We compare results using raw walking tour video inputs (top) versus our crowd-removed versions (bottom). Each image displays the inferred 3D point clouds for the scene visualized from the camera viewpoint of the initial, middle, and final video frames, with overlaid colored circles corresponding to point tracks in the 3D space. Tracking points remain more stable in static background regions, indicating that our crowd removal leads to more reliable and robust reconstruction. Moreover, the resulting point clouds are denser and more consistent, benefiting downstream tasks such as scene modeling and 3D novel view synthesis.

| Continent                             | Country     | City / Area         | URL(s)                                                                                                                                                                                                                                                                                                                                                                            |
|---------------------------------------|-------------|---------------------|-----------------------------------------------------------------------------------------------------------------------------------------------------------------------------------------------------------------------------------------------------------------------------------------------------------------------------------------------------------------------------------|
| <b>Train Background Video Sources</b> |             |                     |                                                                                                                                                                                                                                                                                                                                                                                   |
| Africa                                | Egypt       | Cairo               | <a href="https://youtu.be/TVe7Th_EfrM">https://youtu.be/TVe7Th_EfrM</a>                                                                                                                                                                                                                                                                                                           |
| Asia                                  | China       | Beijing             | <a href="https://youtu.be/FNK5UEObcEg">https://youtu.be/FNK5UEObcEg</a> , <a href="https://youtu.be/MU-obosH1ow">https://youtu.be/MU-obosH1ow</a>                                                                                                                                                                                                                                 |
| Asia                                  | China       | Great Wall          | <a href="https://youtu.be/cVmM6sUcdwg">https://youtu.be/cVmM6sUcdwg</a>                                                                                                                                                                                                                                                                                                           |
| Asia                                  | China       | Shanghai            | <a href="https://youtu.be/Z1i0v6wsGLI">https://youtu.be/Z1i0v6wsGLI</a> , <a href="https://youtu.be/DUANyWsER_o">https://youtu.be/DUANyWsER_o</a>                                                                                                                                                                                                                                 |
| Asia                                  | South Korea | Cheongju            | <a href="https://youtu.be/kqkUJZ11t0U">https://youtu.be/kqkUJZ11t0U</a>                                                                                                                                                                                                                                                                                                           |
| Asia                                  | South Korea | Daegu               | <a href="https://youtu.be/n1V69LjdNQg">https://youtu.be/n1V69LjdNQg</a> , <a href="https://youtu.be/mGLh9Ss_OEo">https://youtu.be/mGLh9Ss_OEo</a>                                                                                                                                                                                                                                 |
| Asia                                  | South Korea | Seoul               | <a href="https://youtu.be/LJaIGjruqtE">https://youtu.be/LJaIGjruqtE</a>                                                                                                                                                                                                                                                                                                           |
| Europe                                | Austria     | Vienna              | <a href="https://youtu.be/LKNyOXwooKo">https://youtu.be/LKNyOXwooKo</a>                                                                                                                                                                                                                                                                                                           |
| Europe                                | France      | Paris               | <a href="https://youtu.be/HJgflqZvT10">https://youtu.be/HJgflqZvT10</a>                                                                                                                                                                                                                                                                                                           |
| Europe                                | Germany     | Berlin              | <a href="https://youtu.be/qgNKZBQW0hA">https://youtu.be/qgNKZBQW0hA</a>                                                                                                                                                                                                                                                                                                           |
| Europe                                | Germany     | Würzburg            | <a href="https://youtu.be/hFzqKwrRdi8">https://youtu.be/hFzqKwrRdi8</a>                                                                                                                                                                                                                                                                                                           |
| Europe                                | Italy       | Pompeii             | <a href="https://youtu.be/9L1jrc2-BTE">https://youtu.be/9L1jrc2-BTE</a>                                                                                                                                                                                                                                                                                                           |
| Europe                                | Italy       | Positano            | <a href="https://youtu.be/UgYMsj4dDfE">https://youtu.be/UgYMsj4dDfE</a>                                                                                                                                                                                                                                                                                                           |
| Europe                                | Spain       | Majorca             | <a href="https://youtu.be/ufPda6XAa7E">https://youtu.be/ufPda6XAa7E</a>                                                                                                                                                                                                                                                                                                           |
| Europe                                | Sweden      | Stockholm           | <a href="https://youtu.be/HJgflqZvT10">https://youtu.be/HJgflqZvT10</a>                                                                                                                                                                                                                                                                                                           |
| Europe                                | UK          | London              | <a href="https://youtu.be/VkFpQAG6mm8">https://youtu.be/VkFpQAG6mm8</a>                                                                                                                                                                                                                                                                                                           |
| North America                         | Canada      | Guelph, ON          | <a href="https://youtu.be/mLk9-S6hpsU">https://youtu.be/mLk9-S6hpsU</a>                                                                                                                                                                                                                                                                                                           |
| North America                         | Canada      | North Vancouver, BC | <a href="https://youtu.be/IAhJvjeM9SI">https://youtu.be/IAhJvjeM9SI</a>                                                                                                                                                                                                                                                                                                           |
| North America                         | Canada      | Surrey, BC          | <a href="https://youtu.be/mjr1r190-VQ">https://youtu.be/mjr1r190-VQ</a>                                                                                                                                                                                                                                                                                                           |
| North America                         | Canada      | Toronto, ON         | <a href="https://youtu.be/5I-WYTYLD0o">https://youtu.be/5I-WYTYLD0o</a>                                                                                                                                                                                                                                                                                                           |
| North America                         | USA         | Atlanta, GA         | <a href="https://youtu.be/mseo6t1hiYs">https://youtu.be/mseo6t1hiYs</a>                                                                                                                                                                                                                                                                                                           |
| North America                         | USA         | Austin, TX          | <a href="https://youtu.be/7cVQAs-c2Lg">https://youtu.be/7cVQAs-c2Lg</a>                                                                                                                                                                                                                                                                                                           |
| North America                         | USA         | Boston, MA          | <a href="https://youtu.be/6ZwGo49Dce8">https://youtu.be/6ZwGo49Dce8</a> , <a href="https://youtu.be/2MHqXI-j-zY">https://youtu.be/2MHqXI-j-zY</a>                                                                                                                                                                                                                                 |
| North America                         | USA         | Cambridge, MA       | <a href="https://youtu.be/uHRH1ba3CyQ">https://youtu.be/uHRH1ba3CyQ</a>                                                                                                                                                                                                                                                                                                           |
| North America                         | USA         | Charleston, SC      | <a href="https://youtu.be/JdPkO2iIvfg">https://youtu.be/JdPkO2iIvfg</a>                                                                                                                                                                                                                                                                                                           |
| North America                         | USA         | Hayward, CA         | <a href="https://youtu.be/9EDA2IHtJFM">https://youtu.be/9EDA2IHtJFM</a>                                                                                                                                                                                                                                                                                                           |
| North America                         | USA         | Honolulu, HI        | <a href="https://youtu.be/JTQdSKz9wEc">https://youtu.be/JTQdSKz9wEc</a>                                                                                                                                                                                                                                                                                                           |
| North America                         | USA         | Houston, TX         | <a href="https://youtu.be/t2ojP7lrfXw">https://youtu.be/t2ojP7lrfXw</a>                                                                                                                                                                                                                                                                                                           |
| North America                         | USA         | Las Vegas, NV       | <a href="https://youtu.be/GH25Pzv0WNo">https://youtu.be/GH25Pzv0WNo</a>                                                                                                                                                                                                                                                                                                           |
| North America                         | USA         | Los Angeles, CA     | <a href="https://youtu.be/kiyUR7xPkAM">https://youtu.be/kiyUR7xPkAM</a> , <a href="https://youtu.be/EM1XQfC1Vdw">https://youtu.be/EM1XQfC1Vdw</a>                                                                                                                                                                                                                                 |
| North America                         | USA         | Miami, FL           | <a href="https://youtu.be/ruXuOM1PAJY">https://youtu.be/ruXuOM1PAJY</a>                                                                                                                                                                                                                                                                                                           |
| North America                         | USA         | New Haven, CT       | <a href="https://youtu.be/r0_sbCxpP58">https://youtu.be/r0_sbCxpP58</a>                                                                                                                                                                                                                                                                                                           |
| North America                         | USA         | New York, NY        | <a href="https://youtu.be/3koOEPntvqk">https://youtu.be/3koOEPntvqk</a> , <a href="https://youtu.be/2UXhhyNYpLc">https://youtu.be/2UXhhyNYpLc</a><br><a href="https://youtu.be/MheS3NBAZJ0">https://youtu.be/MheS3NBAZJ0</a> , <a href="https://youtu.be/YbiCtAdiS6U">https://youtu.be/YbiCtAdiS6U</a><br><a href="https://youtu.be/fYY7uEgPwlc">https://youtu.be/fYY7uEgPwlc</a> |
| North America                         | USA         | Pine Bluff, AR      | <a href="https://youtu.be/3FDjNp77wGo">https://youtu.be/3FDjNp77wGo</a>                                                                                                                                                                                                                                                                                                           |
| North America                         | USA         | Portland, OR        | <a href="https://youtu.be/TkZU-yfUqe8">https://youtu.be/TkZU-yfUqe8</a> , <a href="https://youtu.be/KiZ36s2IUi0">https://youtu.be/KiZ36s2IUi0</a>                                                                                                                                                                                                                                 |
| North America                         | USA         | Provo, UT           | <a href="https://youtu.be/653tnKwzNdg">https://youtu.be/653tnKwzNdg</a>                                                                                                                                                                                                                                                                                                           |
| North America                         | USA         | Sacramento, CA      | <a href="https://youtu.be/W5XSfxIZdMg">https://youtu.be/W5XSfxIZdMg</a>                                                                                                                                                                                                                                                                                                           |
| North America                         | USA         | San Diego, CA       | <a href="https://youtu.be/m13-S2HE16E">https://youtu.be/m13-S2HE16E</a>                                                                                                                                                                                                                                                                                                           |
| North America                         | USA         | San Francisco, CA   | <a href="https://youtu.be/SX-2d1VyTUw">https://youtu.be/SX-2d1VyTUw</a>                                                                                                                                                                                                                                                                                                           |
| North America                         | USA         | San Jose, CA        | <a href="https://youtu.be/DNnNP60oi-mc">https://youtu.be/DNnNP60oi-mc</a> , <a href="https://youtu.be/Kc_NWFQrzpo">https://youtu.be/Kc_NWFQrzpo</a>                                                                                                                                                                                                                               |
| North America                         | USA         | State College, PA   | <a href="https://youtu.be/R81NaRZISTU">https://youtu.be/R81NaRZISTU</a>                                                                                                                                                                                                                                                                                                           |
| North America                         | USA         | Syracuse, NY        | <a href="https://youtu.be/FIq579AzSUG">https://youtu.be/FIq579AzSUG</a>                                                                                                                                                                                                                                                                                                           |
| North America                         | USA         | Washington, DC      | <a href="https://youtu.be/secTBj63dcI">https://youtu.be/secTBj63dcI</a>                                                                                                                                                                                                                                                                                                           |
| North America                         | USA         | Wellesley, MA       | <a href="https://youtu.be/dCxAuWK5gLw">https://youtu.be/dCxAuWK5gLw</a>                                                                                                                                                                                                                                                                                                           |
| North America                         | USA         | North Dakota        | <a href="https://youtu.be/mr02QEJooOQ">https://youtu.be/mr02QEJooOQ</a>                                                                                                                                                                                                                                                                                                           |
| <b>Train Foreground Video Sources</b> |             |                     |                                                                                                                                                                                                                                                                                                                                                                                   |
| Asia                                  | India       | Varanasi            | <a href="https://youtu.be/Odh_7dQwzYQ">https://youtu.be/Odh_7dQwzYQ</a>                                                                                                                                                                                                                                                                                                           |
| Asia                                  | South Korea | Seoul               | <a href="https://youtu.be/D-F4L5Gfhik">https://youtu.be/D-F4L5Gfhik</a> , <a href="https://youtu.be/DF8KDaUn1TA">https://youtu.be/DF8KDaUn1TA</a><br><a href="https://youtu.be/KisjSKv53FA">https://youtu.be/KisjSKv53FA</a>                                                                                                                                                      |
| Europe                                | Germany     | Hamburg             | <a href="https://youtu.be/aqgRc-sne8g">https://youtu.be/aqgRc-sne8g</a>                                                                                                                                                                                                                                                                                                           |
| Europe                                | Netherlands | Amsterdam           | <a href="https://youtu.be/7Ttc3AaPNZs">https://youtu.be/7Ttc3AaPNZs</a>                                                                                                                                                                                                                                                                                                           |
| North America                         | USA         | Anaheim, CA         | <a href="https://youtu.be/Eo8q61Xtc50">https://youtu.be/Eo8q61Xtc50</a>                                                                                                                                                                                                                                                                                                           |
| North America                         | USA         | Honolulu, HI        | <a href="https://youtu.be/eSSrUot4yhQ">https://youtu.be/eSSrUot4yhQ</a>                                                                                                                                                                                                                                                                                                           |
| North America                         | USA         | New York, NY        | <a href="https://youtu.be/bCoqUaLHjy0">https://youtu.be/bCoqUaLHjy0</a> , <a href="https://youtu.be/C_nK_-ZI6Zo">https://youtu.be/C_nK_-ZI6Zo</a>                                                                                                                                                                                                                                 |

Table 4. **Training dataset sources.** Background and foreground video sources used to construct *EgoCrowds*. For cities where a single video did not provide sufficient clips, multiple videos were collected to ensure sufficient coverage.

| Continent                   | Country              | City / Area     | URL(s)                                                                                                  |
|-----------------------------|----------------------|-----------------|---------------------------------------------------------------------------------------------------------|
| <b>Test Data Background</b> |                      |                 |                                                                                                         |
| Africa                      | South Africa         | Cape Town       | <a href="https://www.youtube.com/watch?v=eG_SV5aSBqQ">https://www.youtube.com/watch?v=eG_SV5aSBqQ</a>   |
| Asia                        | United Arab Emirates | Dubai           | <a href="https://www.youtube.com/watch?v=mElSLruob6c">https://www.youtube.com/watch?v=mElSLruob6c</a>   |
| Europe                      | Italy                | Rome            | <a href="https://www.youtube.com/watch?v=xpRDEoEQpwk">https://www.youtube.com/watch?v=xpRDEoEQpwk</a>   |
| Europe                      | Switzerland          | Zurich          | <a href="https://www.youtube.com/watch?v=UcRW2OHqC2o">https://www.youtube.com/watch?v=UcRW2OHqC2o</a>   |
| Europe                      | UK                   | Birmingham      | <a href="https://www.youtube.com/watch?v=I1zFH4yE2Z8">https://www.youtube.com/watch?v=I1zFH4yE2Z8</a>   |
| North America               | USA                  | Boston, MA      | <a href="https://www.youtube.com/watch?v=8NVjJs_jFLEA">https://www.youtube.com/watch?v=8NVjJs_jFLEA</a> |
| North America               | USA                  | Chicago, IL     | <a href="https://www.youtube.com/watch?v=R9VGInHbKik">https://www.youtube.com/watch?v=R9VGInHbKik</a>   |
| <b>Test Data Foreground</b> |                      |                 |                                                                                                         |
| Asia                        | China                | Hong Kong       | <a href="https://www.youtube.com/watch?v=JRvQ_pm87ik">https://www.youtube.com/watch?v=JRvQ_pm87ik</a>   |
| Asia                        | Switzerland          | Zurich          | <a href="https://www.youtube.com/watch?v=65KsVRG1ao8">https://www.youtube.com/watch?v=65KsVRG1ao8</a>   |
| Europe                      | Austria              | Vienna          | <a href="https://www.youtube.com/watch?v=TCRD9Dz6k88">https://www.youtube.com/watch?v=TCRD9Dz6k88</a>   |
| North America               | USA                  | Houston, TX     | <a href="https://www.youtube.com/watch?v=r6cLF5s2B_g">https://www.youtube.com/watch?v=r6cLF5s2B_g</a>   |
| North America               | USA                  | Los Angeles, CA | <a href="https://www.youtube.com/watch?v=Oifxr_fLfNE">https://www.youtube.com/watch?v=Oifxr_fLfNE</a>   |

Table 5. **Quantitative test dataset sources.** Background and foreground video sources used in the quantitative evaluation dataset.

| Continent                               | Country      | City           | URL(s)                                                                                                                                            |
|-----------------------------------------|--------------|----------------|---------------------------------------------------------------------------------------------------------------------------------------------------|
| <b>Crowd Walking Tour Video Sources</b> |              |                |                                                                                                                                                   |
| Asia                                    | India        | Mumbai         | <a href="https://youtu.be/_2GM4gV1ors">https://youtu.be/_2GM4gV1ors</a>                                                                           |
| Asia                                    | Japan        | Tokyo          | <a href="https://youtu.be/jeQd-n7Rot0">https://youtu.be/jeQd-n7Rot0</a>                                                                           |
| Asia                                    | Japan        | Kyoto          | <a href="https://youtu.be/Oh01wqjt_Lg">https://youtu.be/Oh01wqjt_Lg</a>                                                                           |
| Asia                                    | Thailand     | Bangkok        | <a href="https://youtu.be/sWRoDRYi1Lk">https://youtu.be/sWRoDRYi1Lk</a>                                                                           |
| Asia                                    | Indonesia    | Jakarta        | <a href="https://youtu.be/2lSUV5KZgwI">https://youtu.be/2lSUV5KZgwI</a>                                                                           |
| Africa                                  | South Africa | Cape Town      | <a href="https://youtu.be/pL-5CjB0hf8">https://youtu.be/pL-5CjB0hf8</a>                                                                           |
| Africa                                  | Morocco      | Marrakech      | <a href="https://youtu.be/OvN1numZqqU">https://youtu.be/OvN1numZqqU</a>                                                                           |
| Africa                                  | Nigeria      | Lagos          | <a href="https://youtu.be/LZJ000F-CLc">https://youtu.be/LZJ000F-CLc</a>                                                                           |
| North America                           | USA          | New York City  | <a href="https://youtu.be/o012OW9vej8">https://youtu.be/o012OW9vej8</a> , <a href="https://youtu.be/77EXF1RLbiM">https://youtu.be/77EXF1RLbiM</a> |
| North America                           | USA          | Denver         | <a href="https://youtu.be/L3Uz001pO3k">https://youtu.be/L3Uz001pO3k</a>                                                                           |
| North America                           | USA          | Chicago        | <a href="https://youtu.be/750Q94gCOeI">https://youtu.be/750Q94gCOeI</a>                                                                           |
| North America                           | Mexico       | Cancun         | <a href="https://youtu.be/3mU1CbBTIJ8">https://youtu.be/3mU1CbBTIJ8</a> , <a href="https://youtu.be/R1cMESpoHs8">https://youtu.be/R1cMESpoHs8</a> |
| South America                           | Brazil       | Rio de Janeiro | <a href="https://youtu.be/RYxqpz5XS0A">https://youtu.be/RYxqpz5XS0A</a>                                                                           |
| South America                           | Argentina    | Buenos Aires   | <a href="https://youtu.be/Hug4u_7ZYxE">https://youtu.be/Hug4u_7ZYxE</a> , <a href="https://youtu.be/QVYueY43tA8">https://youtu.be/QVYueY43tA8</a> |
| Europe                                  | Croatia      | Dubrovnik      | <a href="https://youtu.be/_93zEDEYBf0">https://youtu.be/_93zEDEYBf0</a>                                                                           |
| Europe                                  | Sweden       | Stockholm      | <a href="https://youtu.be/FuFe9WC3rjg">https://youtu.be/FuFe9WC3rjg</a>                                                                           |
| Europe                                  | Spain        | Seville        | <a href="https://youtu.be/m4AmnRnWcRk">https://youtu.be/m4AmnRnWcRk</a> , <a href="https://youtu.be/1o_V2qXNyUM">https://youtu.be/1o_V2qXNyUM</a> |
| Europe/Asia                             | Turkey       | Istanbul       | <a href="https://youtu.be/ZOGEYkHyNWU">https://youtu.be/ZOGEYkHyNWU</a> , <a href="https://youtu.be/Hp3gETuZa8o">https://youtu.be/Hp3gETuZa8o</a> |

Table 6. **Qualitative test dataset sources.** Real walking tour video sources used for qualitative evaluation. For cities where a single video did not provide sufficient clips, multiple videos were collected to ensure sufficient coverage.
